# Supplementary material for: Ligand-controlled nuclearity in nickel bis(benzimidazolyl) complexes
Source: Royal Society of Chemistry journal article supplement (doi:10.1039/b701367a), 2007-01-01
Supplement: b701367a.pdf [file b701367a.pdf]

## Supporting Information

For

### Ligand-Controlled Nuclearity in Nickel Bis(benzimidazolyl) Complexes

Way-Zen Lee,<sup>\*a</sup> Huan-Sheng Tsang,<sup>a</sup> and Ting-Shen Kuo<sup>b</sup>

*Department of Chemistry, National Taiwan Normal University, Taipei 11650, Taiwan,  
and Instrumentation Center, National Taiwan Normal University, Taipei 11650,  
Taiwan*

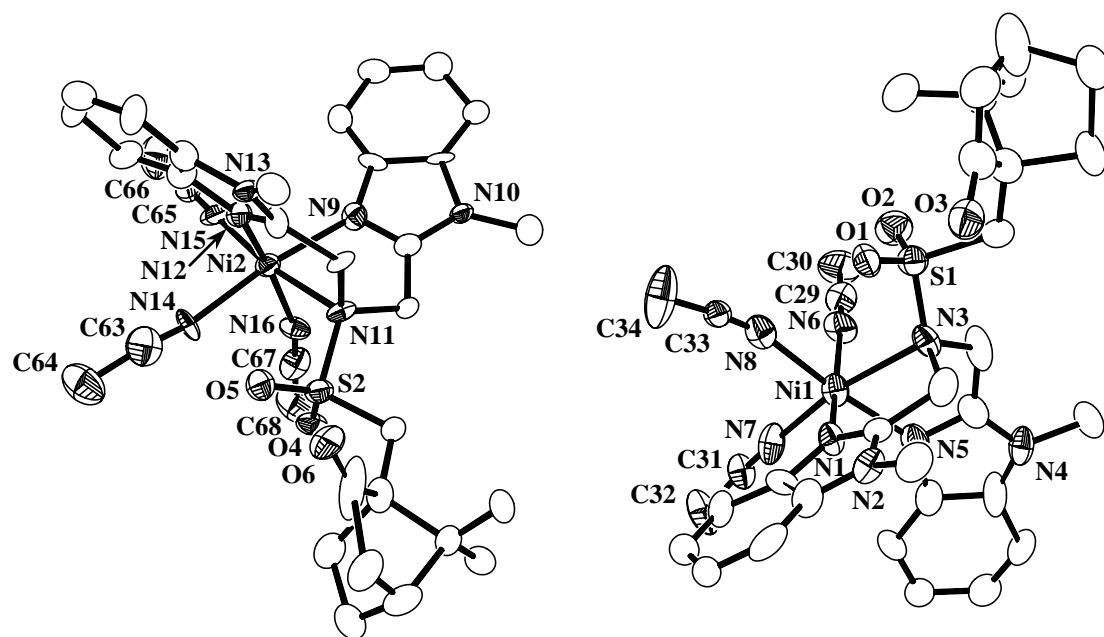

**Figure S1.** Thermal ellipsoid representation of complex **4** in its asymmetric cell at 50 % probability level. Hydrogen atoms, solvent molecules and the counter anions are omitted for clarity.
